# Supplementary material for: A porous ternary PtPdCu alloy with a spherical network structure for electrocatalytic methanol oxidation
Source: Royal Society of Chemistry journal article supplement (doi:10.1039/c6ra18720j), 2016-01-01
Supplement: c6ra18720j1.pdf [file c6ra18720j1.pdf]

## Electronic Supplementary Information

### Porous ternary PtPdCu alloy with spherical network structure for electrocatalytic methanol oxidation

Yang Fan,<sup>\*ac</sup> Yan Zhang,<sup>a</sup> Ying Cui,<sup>a</sup> Jiaoli Wang,<sup>a</sup> Mengmeng Wei,<sup>a</sup> Xinkang Zhang<sup>a</sup>, Wei Li<sup>\*b</sup>

<sup>a</sup>College of Chemistry and Chemical Engineering, Xinyang Normal University, Xinyang 464000, China. E-mail: yfanchem@163.com

<sup>b</sup>School of Physics, Huazhong University of Science and Technology, Wuhan 430074, China. E-mail: wl276@hust.edu.cn

<sup>c</sup>Institute for Conservation and Utilization of Agro-bioresources in Dabie Mountains, Xinyang Normal University, Xinyang 464000, China.

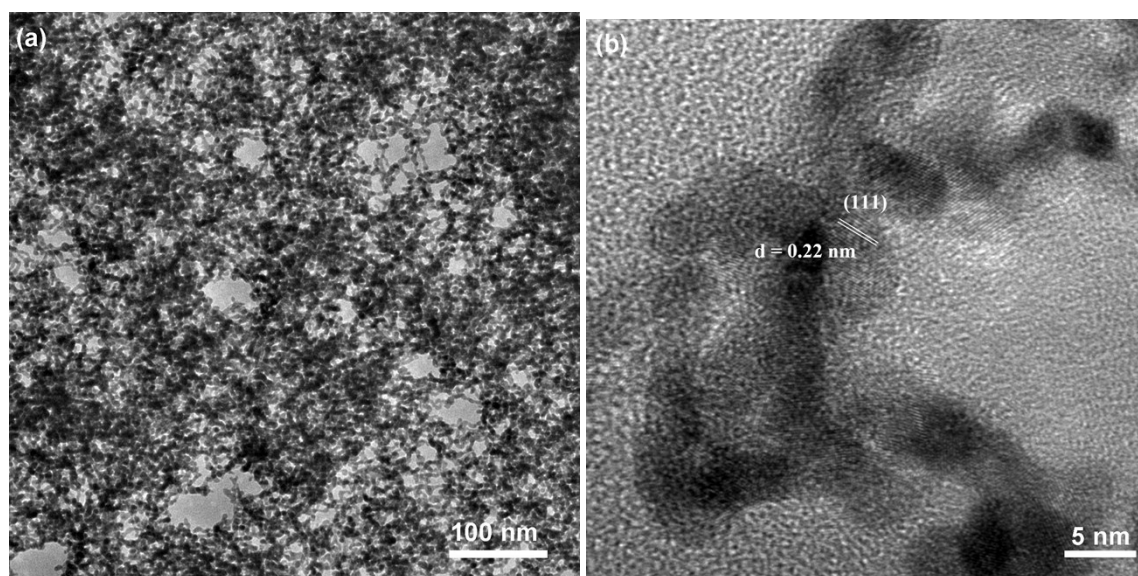

**Fig. S1** (a) TEM and (b) HRTEM image of Pt<sub>5</sub>PdCu<sub>5</sub> NSs

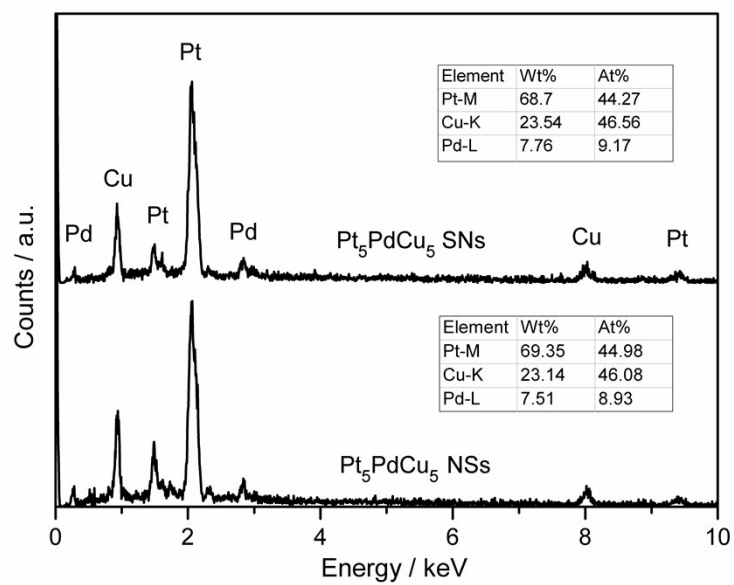

**Fig. S2** EDS spectra of Pt<sub>5</sub>PdCu<sub>5</sub> SNs and Pt<sub>5</sub>PdCu<sub>5</sub> NSs.

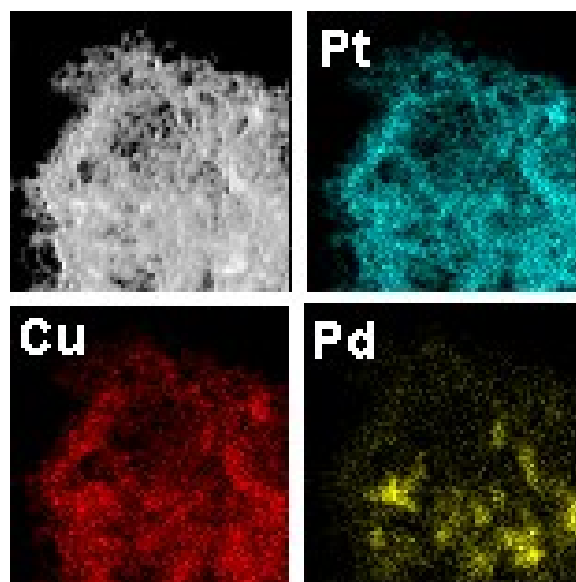

**Fig. S3** HAADF-STEM image and EDS mapping images of Pt<sub>5</sub>PdCu<sub>5</sub> SNs.

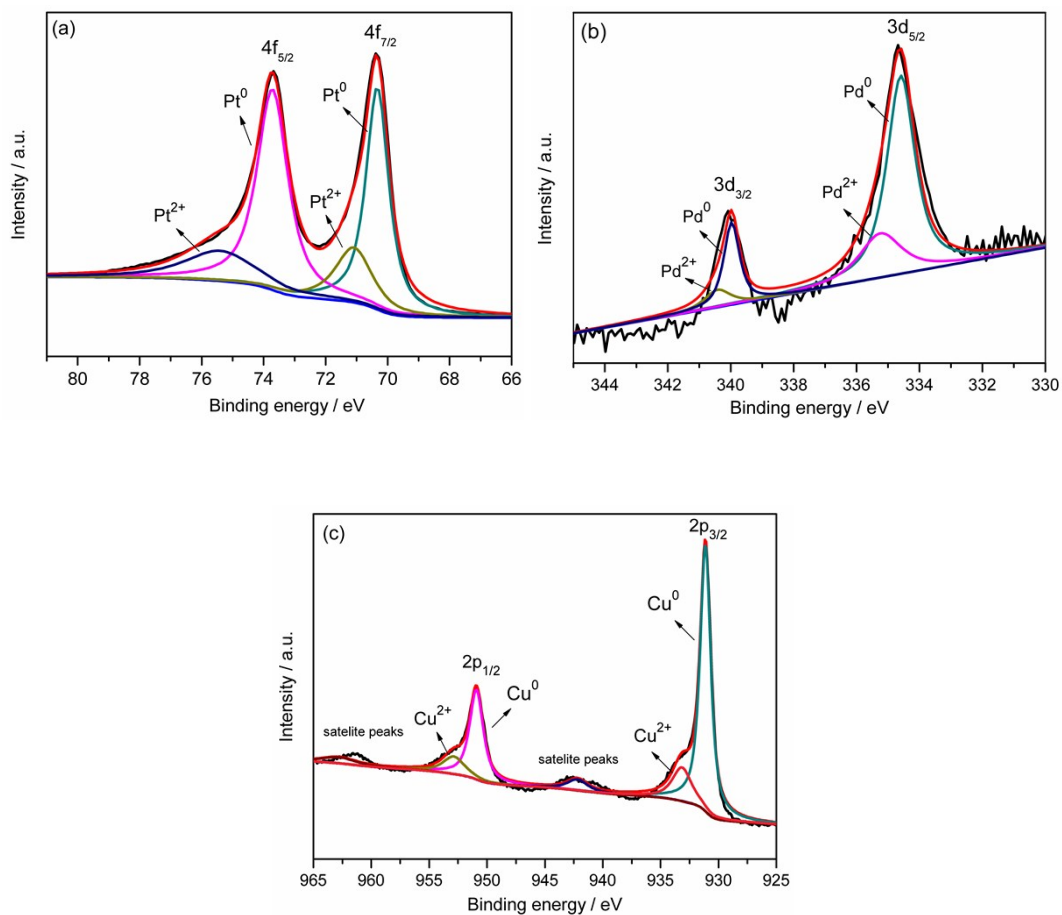

**Fig. S4** XPS spectra of the deconvoluted (a) Pt 4f, (b) Pd 3d and (c) Cu 2p peaks for Pt<sub>5</sub>PdCu<sub>5</sub> NSs.

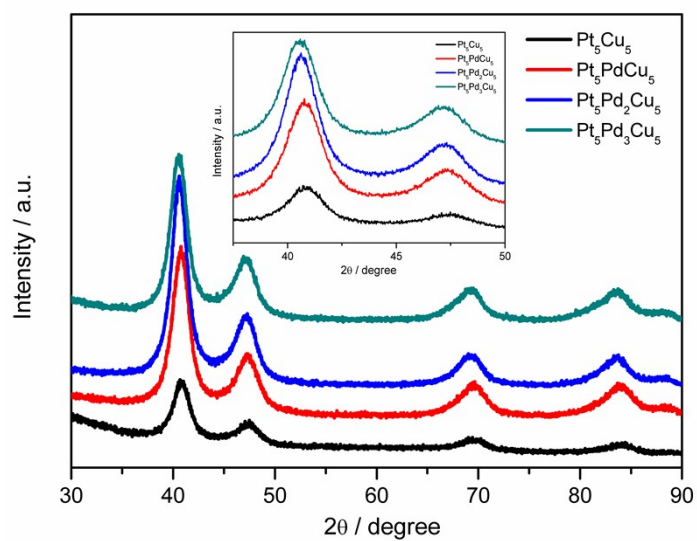

**Fig. S5** XRD patterns of alloy samples with different compositions.

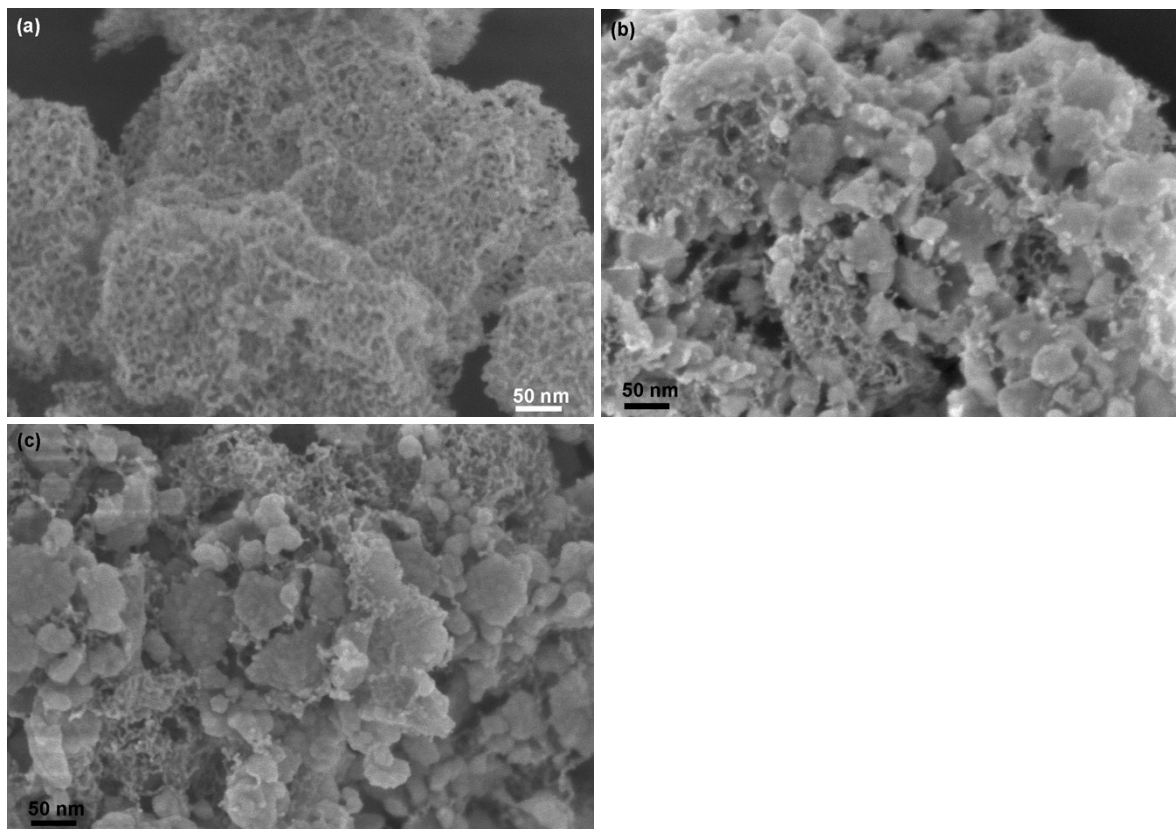

**Fig. S6** SEM images of (a)  $\text{Pt}_5\text{Cu}_5$ , (b)  $\text{Pt}_5\text{Pd}_2\text{Cu}_5$  and (c)  $\text{Pt}_5\text{Pd}_3\text{Cu}_5$ .

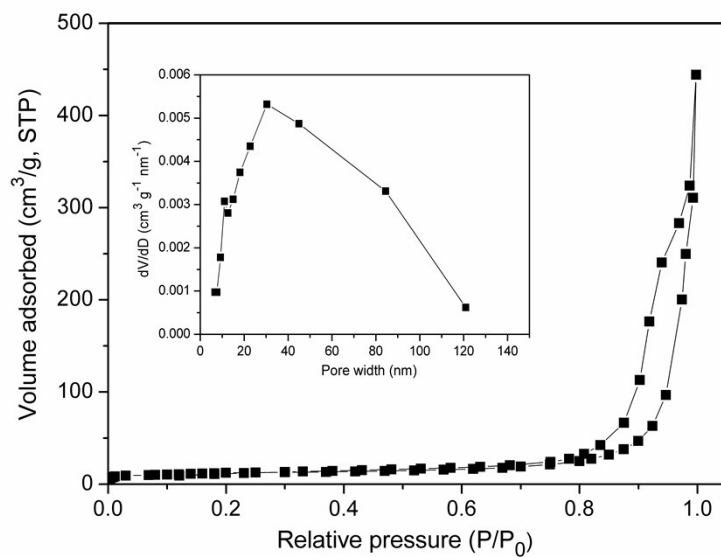

**Fig. S7**  $\text{N}_2$  adsorption-desorption isotherms and (insert) pore size distribution curves of  $\text{Pt}_5\text{Cu}_5$ .

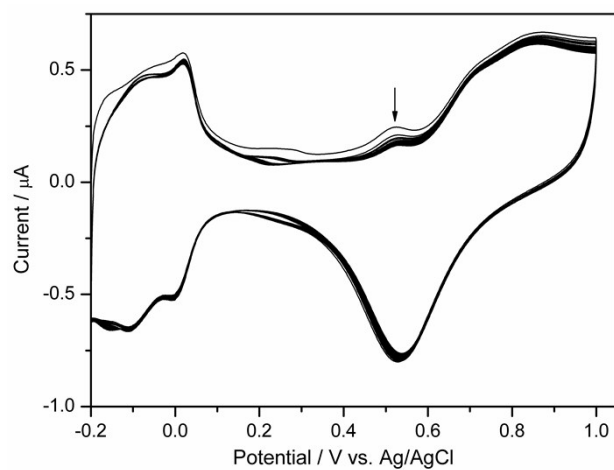

**Fig. S8** CV curves of Pt<sub>5</sub>PdCu<sub>5</sub> NSs recorded during the first 20 cycles at scan rate of 50 mV s<sup>-1</sup>.

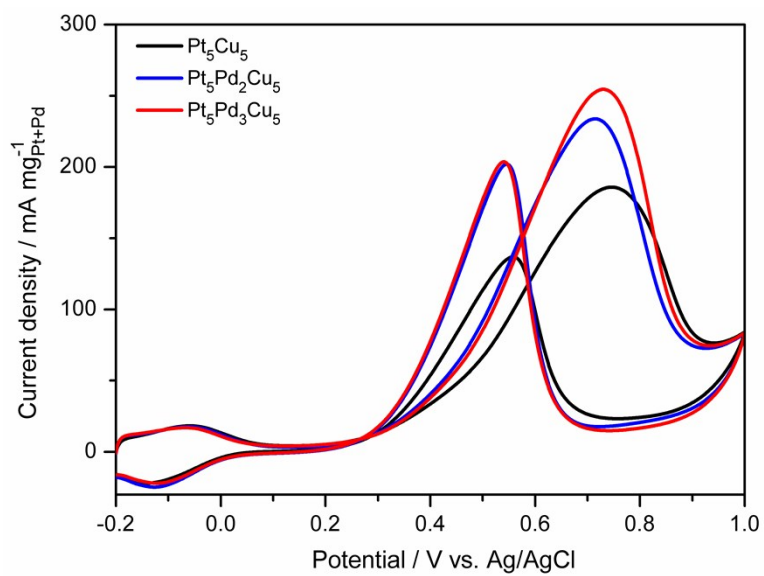

**Fig. S9** CV curves measured in 0.5 M H<sub>2</sub>SO<sub>4</sub> + 0.5 M CH<sub>3</sub>OH at scan rate of 50 mV s<sup>-1</sup>.
